# Supplementary material for: Free radical routes for prebiotic formation of DNA nucleobases from formamide
Source: Royal Society of Chemistry journal article supplement (doi:10.1039/c3cp53108b), 2013-01-01

## Supplementary Information

### Free Radical Routes for Prebiotic Formation of DNA Nucleobases from Formamide

Yassin A. Jeilani,<sup>\*,a</sup> Huyen Thi Nguyen,<sup>b</sup> Dominique Newallo,<sup>a</sup> Jean-Marie D. Dimandja<sup>a</sup>  
and Minh Tho Nguyen<sup>\*,b</sup>

<sup>a)</sup> Department Chemistry and Biochemistry, Spelman College, Atlanta, GA 30314, USA

<sup>b)</sup> Department of Chemistry, University of Leuven, B-3001 Leuven, Belgium

The supporting information includes: (1) coordinates for optimized geometries of all species, (2) coordinates of geometries for all transition states, (3) Structure of two conformers of **3**, (3) structure of radical:neutral molecule complexes

#### List of Coordinates: From species 1 to 36

##### Coordinates of 1

FM

0 1

|   |             |             |             |
|---|-------------|-------------|-------------|
| N | 1.08421200  | -0.15718500 | -0.00011700 |
| H | 1.18222300  | -1.16103000 | 0.00034000  |
| H | 1.90961500  | 0.41786200  | 0.00059000  |
| C | -0.16375600 | 0.38544200  | 0.00001000  |
| H | -0.13383100 | 1.49307900  | -0.00003200 |
| O | -1.19561900 | -0.24528300 | -0.00001800 |

##### Coordinates of 2

FM

0 2

|   |             |             |             |
|---|-------------|-------------|-------------|
| N | 1.12970100  | -1.02793500 | -0.08641100 |
| H | 1.07753000  | -1.07267000 | -1.10119700 |
| H | 2.10225500  | -0.96690600 | 0.20103000  |
| C | 0.37741600  | 0.12871200  | 0.41306600  |
| H | 0.49002900  | 0.17211000  | 1.50472400  |
| O | 0.98032200  | 1.15545700  | -0.24729800 |
| C | -1.06333600 | -0.03023000 | 0.09222700  |
| N | -2.18639600 | -0.11022000 | -0.15043700 |

##### Coordinates of 3

FM

0 2  
N -0.89084800 1.33292700 -0.07591200  
H -1.20455200 1.18113500 -1.04460700  
C -0.43644400 0.03548600 0.37760500  
H -0.55323200 0.00010800 1.46930100  
O -1.06580600 -1.07298400 -0.23858700  
C 1.01167200 -0.04821000 0.08845400  
N 2.13955400 -0.09039400 -0.14087100  
H -1.90808100 -1.21875900 0.20512300

#### Coordinates of 4

FM

0 1  
N 1.62953900 -0.32826900 0.00000300  
H 1.30778900 -1.29990000 -0.00000200  
C 0.65123200 0.48106200 -0.00000700  
H 0.84753800 1.55307600 0.00001900  
C -0.74520100 0.10278900 -0.00000200  
N -1.85689900 -0.20834200 0.00000200

#### Coordinates of 5

FM

0 2  
N -1.62814100 -0.46831700 -0.00030900  
H -1.16189600 -1.38232700 0.00126700  
C -0.61337800 0.56429100 0.00009300  
H -0.78624800 1.21475900 -0.86956800  
C 0.78659500 0.12297300 -0.00004300  
N 1.87029200 -0.27022300 -0.00005700  
H -0.78621800 1.21376700 0.87056400

#### Coordinates of 6

FM

0 2  
N 0.22047600 -0.80663400 -0.44949700  
H 0.66038000 -1.66514500 -0.75560000  
C -1.06049500 -1.06449700 0.19534400  
H -1.50972000 -1.95176800 -0.25748700  
C -2.01506100 0.04220900 0.02809400  
N -2.78303100 0.89314300 -0.08594200  
H -0.97285700 -1.26507900 1.27595600  
C 1.19111700 -0.04319900 0.32097500  
H 1.02584400 -0.14424100 1.41083800  
N 1.06713700 1.38125600 -0.02150800  
H 1.71713500 1.96341900 0.49844000

|   |            |             |             |
|---|------------|-------------|-------------|
| H | 1.18527900 | 1.50510600  | -1.02366900 |
| O | 2.45856300 | -0.29046500 | -0.06454100 |

#### Coordinates of **7**

FM

0 2

|   |             |             |             |
|---|-------------|-------------|-------------|
| N | -0.18292300 | -0.11721300 | 0.92331700  |
| H | -0.71624400 | -0.71698400 | 1.54684400  |
| C | 1.03293800  | -0.83581400 | 0.52029300  |
| H | 1.49310900  | -1.26060500 | 1.41571600  |
| C | 2.00516800  | 0.07433500  | -0.09580300 |
| N | 2.76249500  | 0.78351100  | -0.59675800 |
| H | 0.83900800  | -1.65870600 | -0.18026400 |
| C | -1.04245600 | 0.24968800  | -0.18753300 |
| H | -0.43209900 | 0.86457300  | -0.87840100 |
| N | -2.14712100 | 1.05216200  | 0.23410600  |
| H | -1.75281900 | 1.78334100  | 0.83676500  |
| O | -1.50562800 | -0.90834200 | -0.86167000 |
| H | -2.38698500 | -0.70335800 | -1.19369700 |

#### Coordinates of **8**

FM

0 2

|   |             |             |             |
|---|-------------|-------------|-------------|
| N | 0.74359300  | 1.18960600  | -0.30481800 |
| H | 0.70170500  | 1.59673900  | -1.23312600 |
| C | -0.59333300 | 1.20957900  | 0.31021900  |
| H | -0.52136000 | 1.31054500  | 1.39413400  |
| C | -1.18968200 | -0.18085100 | -0.00617300 |
| N | -2.35466400 | -0.55673000 | 0.26347400  |
| H | -1.20711600 | 2.02086600  | -0.07782500 |
| C | 1.09883100  | -0.21377600 | -0.42428900 |
| H | 1.76721400  | -0.36643900 | -1.27927100 |
| N | -0.16218700 | -0.90132900 | -0.62462400 |
| H | -0.17738600 | -1.90789900 | -0.53026600 |
| O | 1.69228400  | -0.69594800 | 0.76594200  |
| H | 2.41658900  | -0.09676300 | 0.98205800  |

#### Coordinates of **8-NH3**

FM

0 2

|   |             |            |             |
|---|-------------|------------|-------------|
| N | 2.00875700  | 0.06712800 | -0.32286200 |
| H | 2.31794700  | 0.30810600 | -1.25881800 |
| C | 1.35946800  | 1.23424700 | 0.29556100  |
| H | 1.49812300  | 1.22944900 | 1.37783700  |
| C | -0.14627700 | 1.04018900 | -0.00096300 |
| N | -1.05921700 | 1.85784500 | 0.28381800  |

|   |             |             |             |
|---|-------------|-------------|-------------|
| H | 1.74300200  | 2.17271100  | -0.10237300 |
| C | 0.96427300  | -0.94398700 | -0.42759100 |
| H | 1.15615400  | -1.60012400 | -1.28460600 |
| N | -0.26292800 | -0.20501400 | -0.60201700 |
| H | -1.18040400 | -0.66123600 | -0.53030700 |
| O | 0.88072700  | -1.70370100 | 0.76717300  |
| H | 1.77358900  | -2.01395900 | 0.95895900  |
| H | -3.08107300 | 0.35446500  | 0.25838100  |
| N | -3.12525700 | -0.61735500 | -0.04282800 |
| H | -3.40149700 | -1.17124600 | 0.76187400  |
| H | -3.86591900 | -0.68947500 | -0.73315100 |

### Coordinates of **9**

FM

0 2

|   |             |             |             |
|---|-------------|-------------|-------------|
| N | -1.29801000 | -1.34800200 | 0.12972600  |
| H | -1.80810000 | -1.63496000 | 0.95617200  |
| C | -1.84850200 | -0.08265200 | -0.40017600 |
| H | -1.90451900 | -0.10134400 | -1.49123100 |
| C | -0.86605600 | 1.00126400  | 0.02793700  |
| N | -1.03840300 | 2.23527400  | -0.22399600 |
| H | -2.85004600 | 0.11359100  | -0.01684500 |
| C | 0.08138700  | -1.07482100 | 0.48765600  |
| H | 0.36767600  | -1.63299400 | 1.38548500  |
| N | 0.16027300  | 0.34788200  | 0.69798400  |
| O | 0.95812800  | -1.43791400 | -0.58753600 |
| H | 0.60174300  | -2.25635600 | -0.95250300 |
| N | 3.04926300  | 0.69815400  | -0.00746400 |
| H | 3.96030200  | 1.00917900  | -0.36557000 |
| H | 2.82589000  | -0.15557700 | -0.53828400 |
| H | -0.25729400 | 2.79684700  | 0.11802800  |
| H | 1.08648900  | 0.76901400  | 0.73878900  |

### Coordinates of **10-NH3**

FM

0 2

|   |             |             |             |
|---|-------------|-------------|-------------|
| N | -2.00068100 | 0.33225700  | 0.43541400  |
| H | -2.27459300 | 0.54828400  | 1.38596900  |
| C | -1.17751500 | 1.41142900  | -0.13063900 |
| H | -1.44556000 | 1.62962100  | -1.16853700 |
| C | 0.23506300  | 0.83844800  | -0.07054300 |
| N | 1.30016900  | 1.53481100  | -0.40527000 |
| H | -1.26374700 | 2.33855800  | 0.43783200  |
| C | -1.15962500 | -0.86360400 | 0.41076900  |
| H | -1.30041200 | -1.45533300 | 1.32371700  |
| N | 0.23696800  | -0.44603500 | 0.30322900  |
| O | -1.43297000 | -1.64549900 | -0.73639400 |
| H | -2.36912200 | -1.50091100 | -0.91731700 |

|   |            |             |             |
|---|------------|-------------|-------------|
| N | 3.36427800 | -0.65599400 | 0.12640600  |
| H | 3.82220000 | -1.10788200 | -0.65874100 |
| H | 3.96439500 | -0.77134900 | 0.93674100  |
| H | 2.14517300 | 0.96151200  | -0.22992100 |
| H | 2.49275900 | -1.15142400 | 0.30543400  |

#### Coordinates of **10**

FM

0 2

|   |             |             |             |
|---|-------------|-------------|-------------|
| N | 0.84341500  | 1.15626400  | -0.25764000 |
| H | 0.89262100  | 1.64490600  | -1.14360500 |
| C | -0.51041100 | 1.24145300  | 0.31208300  |
| H | -0.48739500 | 1.38862700  | 1.39559400  |
| C | -1.10119500 | -0.12403900 | -0.01631000 |
| N | -2.35656800 | -0.43625900 | 0.21502900  |
| H | -1.09214900 | 2.05432300  | -0.12413800 |
| C | 1.09795100  | -0.27043100 | -0.45126900 |
| H | 1.66368500  | -0.44154500 | -1.37483200 |
| N | -0.19050000 | -0.96279900 | -0.52316700 |
| O | 1.77096200  | -0.81503300 | 0.66500900  |
| H | 2.37449700  | -0.12225600 | 0.95839000  |
| H | -2.51145100 | -1.38612900 | -0.13806500 |

#### Coordinates of **11**

FM

0 1

|   |             |             |             |
|---|-------------|-------------|-------------|
| N | -1.43175200 | 0.49624700  | -0.07745800 |
| H | -2.31440000 | 0.91143800  | 0.17039500  |
| C | -0.14620800 | 1.18593500  | 0.02329300  |
| H | 0.03265800  | 1.85540100  | -0.82002600 |
| C | 0.81608800  | -0.01047500 | 0.00893000  |
| N | 2.07656000  | 0.11484300  | -0.01456700 |
| H | -0.05512700 | 1.75515500  | 0.95316900  |
| C | -1.18261200 | -0.84078800 | 0.00190000  |
| H | -2.00922300 | -1.54353800 | 0.02152200  |
| N | 0.05787400  | -1.20723100 | 0.02008000  |
| H | 2.50370700  | -0.81350200 | -0.02618600 |

#### Coordinates of **12**

FM

0 2

|   |             |            |             |
|---|-------------|------------|-------------|
| N | 1.37463400  | 0.57655500 | -0.00006100 |
| H | 2.24778000  | 1.07910800 | 0.00012200  |
| C | 0.12434300  | 1.12749000 | 0.00003800  |
| C | -0.77671000 | 0.03399600 | 0.00011100  |
| N | -2.09213700 | 0.12937900 | -0.00013900 |

|   |             |             |             |
|---|-------------|-------------|-------------|
| H | -0.06072200 | 2.18764900  | 0.00012300  |
| C | 1.21992900  | -0.79662900 | -0.00005700 |
| H | 2.07496200  | -1.45773600 | -0.00015300 |
| N | -0.02451300 | -1.15995900 | 0.00007900  |
| H | -2.47327800 | -0.81999200 | 0.00019600  |

#### Coordinates of **14**

FM

0 2

|   |             |             |             |
|---|-------------|-------------|-------------|
| N | -2.24621700 | 0.86643300  | 0.32630000  |
| H | -2.87484800 | 1.59302500  | 0.62709300  |
| C | -0.93115800 | 1.04704200  | -0.07686400 |
| C | -0.48987400 | -0.21796500 | -0.39604400 |
| N | 0.75305600  | -0.62974900 | -0.89669700 |
| H | -0.45412400 | 2.00804300  | -0.13076900 |
| C | -2.53035000 | -0.45700600 | 0.22140000  |
| H | -3.49744800 | -0.86851100 | 0.46607900  |
| N | -1.48924900 | -1.14302700 | -0.20141500 |
| C | 1.96819600  | -0.17164600 | -0.22494300 |
| N | 2.08429200  | 1.26039200  | -0.34586500 |
| H | 2.91084700  | 1.49233900  | 0.21718400  |
| H | 0.74380900  | -1.63586700 | -1.01251000 |
| H | 2.80606900  | -0.62708800 | -0.77755700 |
| N | 2.14760700  | -0.54954300 | 1.18628700  |
| H | 1.33957400  | -0.23475100 | 1.71781800  |
| H | 2.17881800  | -1.56128500 | 1.27110600  |

#### Coordinates of **15**

FM

0 2

|   |             |             |             |
|---|-------------|-------------|-------------|
| N | 2.89672300  | -1.15260900 | 0.60347100  |
| H | 3.34691800  | -1.81293400 | 1.21565900  |
| C | 1.54293000  | -0.84346600 | 0.59728000  |
| C | 1.40687100  | 0.09395400  | -0.40331700 |
| N | 0.26050200  | 0.73759600  | -0.88373300 |
| H | 0.82639800  | -1.30735200 | 1.24951600  |
| C | 3.49050400  | -0.41505000 | -0.36833200 |
| H | 4.54724100  | -0.46915800 | -0.58031700 |
| N | 2.62313100  | 0.35559700  | -0.99030600 |
| C | -0.74530000 | 1.24758400  | 0.05751000  |
| N | -1.43710200 | 0.11046100  | 0.64915900  |
| H | -1.99717900 | 0.41264900  | 1.43924700  |
| C | -2.19733400 | -0.72830500 | -0.23674600 |
| H | -1.55066700 | -1.04922100 | -1.06151300 |
| O | -2.84317100 | -1.72825300 | 0.41377000  |
| H | 0.52279800  | 1.42543600  | -1.57806800 |

|   |             |             |             |
|---|-------------|-------------|-------------|
| H | -1.41006300 | 1.87145800  | -0.55486600 |
| N | -0.29022200 | 2.06859700  | 1.16945700  |
| H | 0.42612300  | 1.56754600  | 1.68889300  |
| H | 0.12591600  | 2.92564200  | 0.82075900  |
| N | -3.36946700 | -0.03572400 | -0.84999000 |
| H | -3.79245200 | -0.60411400 | -1.57923200 |
| H | -4.07064500 | 0.15034100  | -0.13501100 |

### Coordinates of **16**

FM

0 2

|   |             |             |             |
|---|-------------|-------------|-------------|
| N | -2.77904200 | -0.75259400 | 0.90020600  |
| H | -3.30468500 | -0.96853100 | 1.73127300  |
| C | -1.89854500 | 0.30815800  | 0.74956300  |
| C | -1.40315600 | 0.16819700  | -0.52670100 |
| N | -0.50607000 | 0.97167000  | -1.24613000 |
| H | -1.71996400 | 1.03907200  | 1.51600200  |
| C | -2.77881400 | -1.45387500 | -0.26213900 |
| H | -3.38520700 | -2.33323300 | -0.41462700 |
| N | -1.95629600 | -0.92795500 | -1.14396900 |
| C | 0.72300600  | 1.45989900  | -0.63397100 |
| H | 1.29232700  | 1.88878900  | -1.46961500 |
| N | 1.60975500  | 0.45186600  | -0.05155300 |
| N | 0.36840300  | 2.42959200  | 0.39168700  |
| H | 1.19863900  | 2.90024400  | 0.73629800  |
| H | 2.21220600  | -0.05586500 | -0.69946700 |
| C | 1.52245700  | -0.08515600 | 1.19781300  |
| O | 2.17502900  | -1.04653100 | 1.57868800  |
| H | -0.25601100 | 3.11886100  | -0.01241000 |
| H | -0.33379000 | 0.54581800  | -2.14808700 |
| H | 0.82592100  | 0.44921200  | 1.85636600  |
| N | 3.50287100  | -1.64637600 | -1.05208100 |
| H | 3.34130500  | -1.84791500 | -0.05238400 |
| H | 4.06198400  | -2.43097300 | -1.40736700 |

### Coordinates of **17**

FM

0 1

|   |             |             |             |
|---|-------------|-------------|-------------|
| N | 2.43675500  | 0.68399900  | 0.88208000  |
| H | 2.89055700  | 1.21867800  | 1.60454800  |
| C | 1.27790200  | -0.06211800 | 1.03150900  |
| C | 1.02867000  | -0.56769200 | -0.22350500 |
| N | 0.01090200  | -1.42346800 | -0.67194000 |
| H | 0.76576200  | -0.17368800 | 1.96908100  |
| C | 2.82377800  | 0.58599100  | -0.41545000 |
| H | 3.70516700  | 1.07424700  | -0.80127100 |
| N | 1.99343600  | -0.15970000 | -1.11226100 |
| C | -1.37954400 | -1.18868900 | -0.30949700 |

|   |             |             |             |
|---|-------------|-------------|-------------|
| H | -1.95005000 | -1.86898100 | -0.95732600 |
| N | -1.91930700 | 0.14513000  | -0.58646200 |
| N | -1.53464100 | -1.46241700 | 1.11007100  |
| H | -2.51515200 | -1.45336900 | 1.37056900  |
| H | -2.16450600 | 0.34032300  | -1.54889100 |
| C | -1.81022000 | 1.26931300  | 0.19557300  |
| H | -1.46928800 | 1.04878700  | 1.21635000  |
| O | -2.09912600 | 2.38282700  | -0.19008800 |
| H | -1.14709300 | -2.37736500 | 1.31131300  |
| H | 0.12408200  | -1.57688200 | -1.66586800 |

### Coordinates of **18**

FM

0 2

|   |             |             |             |
|---|-------------|-------------|-------------|
| N | -2.46044800 | 1.13802400  | 0.07230300  |
| H | -2.86492000 | 2.06031000  | 0.11837800  |
| C | -1.14215200 | 0.83992800  | 0.25771100  |
| C | -1.03821100 | -0.57021100 | 0.05936000  |
| N | -0.03905900 | -1.43285800 | 0.09174700  |
| H | -0.41830400 | 1.61268100  | 0.44339700  |
| C | -3.11888300 | -0.03879400 | -0.22312100 |
| H | -4.18297200 | -0.05915400 | -0.40940000 |
| N | -2.32653900 | -1.06048500 | -0.24150200 |
| C | 1.31225600  | -1.10834800 | 0.47918600  |
| H | 1.42110400  | -1.53426400 | 1.49235400  |
| N | 1.71374000  | 0.29615000  | 0.62339900  |
| N | 2.18776600  | -1.73315000 | -0.50240300 |
| H | 3.10329600  | -1.91448100 | -0.10486500 |
| H | 1.52915000  | 0.74069100  | 1.51309800  |
| C | 1.97175100  | 1.15705400  | -0.40751700 |
| H | 2.14703300  | 0.63735300  | -1.35967400 |
| O | 2.00745100  | 2.36663300  | -0.27436200 |
| H | 1.76921400  | -2.60773900 | -0.79693700 |

### Coordinates of **19**

FM

0 2

|   |             |             |             |
|---|-------------|-------------|-------------|
| N | -2.19311400 | 0.43163400  | 0.25526700  |
| H | -2.79990200 | 1.15510300  | 0.60438500  |
| C | -0.77232700 | 0.42352900  | 0.44865800  |
| C | -0.42633700 | -0.99840700 | -0.01970200 |
| N | 0.71927700  | -1.41990500 | -0.36008000 |
| H | -0.48619900 | 0.63828500  | 1.47974400  |
| C | -2.57433500 | -0.85645200 | -0.00638300 |
| H | -3.62528200 | -1.10408800 | -0.10040700 |
| N | -1.62630900 | -1.72431800 | -0.16209500 |
| C | 1.84533900  | -0.47019300 | -0.38551200 |
| N | 1.49599000  | 0.94336100  | -0.20485600 |



|   |             |             |             |
|---|-------------|-------------|-------------|
| H | 1.92389900  | 1.35870800  | 0.61377500  |
| C | 0.15810400  | 1.41612600  | -0.43829200 |
| H | -0.14852500 | 1.22849000  | -1.48394100 |
| O | -0.14714800 | 2.61394200  | 0.00711000  |
| H | 2.28845600  | -0.60263400 | -1.37803600 |
| N | 2.86705700  | -0.80177400 | 0.59443600  |
| H | 2.42056600  | -1.05664300 | 1.47194200  |
| H | 3.38120400  | -1.61936100 | 0.28434200  |

### Coordinates of **20**

FM

0 1

|   |             |             |             |
|---|-------------|-------------|-------------|
| N | -2.10190400 | 0.43534300  | 0.46441700  |
| H | -2.59031700 | 1.31633600  | 0.42588200  |
| C | -0.66449100 | 0.33529800  | 0.57582400  |
| C | -0.41041400 | -1.01153800 | -0.10463700 |
| N | 0.72773600  | -1.41815700 | -0.49600500 |
| H | -0.36483700 | 0.27679700  | 1.63122500  |
| C | -2.53768400 | -0.74538900 | -0.05931800 |
| H | -3.59674500 | -0.90620400 | -0.22489100 |
| N | -1.63881200 | -1.64623900 | -0.32552500 |
| C | 1.83513200  | -0.47796800 | -0.37900400 |
| N | 1.41605000  | 0.94173800  | -0.36717500 |
| H | 2.08270500  | 1.61508100  | -0.71863400 |
| C | 0.17951800  | 1.42063400  | -0.07095400 |
| O | -0.20781900 | 2.56004700  | -0.24600500 |
| H | 2.42962400  | -0.60422700 | -1.28754700 |
| N | 2.73515400  | -0.73086000 | 0.73954000  |
| H | 2.21740500  | -0.70353900 | 1.61471300  |
| H | 3.10477200  | -1.67360400 | 0.64906800  |

### Coordinates of **21**

FM

0 2

|   |             |             |             |
|---|-------------|-------------|-------------|
| N | -2.16411800 | 0.52438500  | 0.07184500  |
| H | -2.68393300 | 1.38681100  | 0.14274600  |
| C | -0.81597100 | 0.42836400  | -0.06172800 |
| C | -0.52203200 | -0.95460400 | -0.08643500 |
| N | 0.68510100  | -1.47043300 | -0.19405200 |
| C | -2.64500300 | -0.77256900 | 0.11961300  |
| H | -3.70245100 | -0.97226500 | 0.21543800  |
| N | -1.71307800 | -1.67708200 | 0.03270600  |
| C | 1.76916900  | -0.51955800 | -0.37127000 |
| N | 1.44695500  | 0.89840500  | -0.11210300 |
| H | 2.23807200  | 1.52650700  | -0.07860500 |
| C | 0.20181900  | 1.46772900  | -0.03927100 |
| O | -0.01993500 | 2.66414200  | 0.07315700  |

|   |            |             |             |
|---|------------|-------------|-------------|
| H | 2.07751300 | -0.61968400 | -1.42420000 |
| N | 2.93902200 | -0.82969400 | 0.43418600  |
| H | 2.65286500 | -0.90843500 | 1.40763700  |
| H | 3.29235300 | -1.74130100 | 0.15820500  |

### Coordinates of **22**

FM

0 1

|   |             |             |             |
|---|-------------|-------------|-------------|
| N | 1.40692800  | 1.22935500  | 0.00000200  |
| H | 1.47181700  | 2.23573300  | 0.00000400  |
| C | 0.24467500  | 0.49811000  | -0.00000900 |
| C | 0.64255600  | -0.83716000 | -0.00000300 |
| N | -0.23103700 | -1.89282600 | 0.00000200  |
| C | 2.42743100  | 0.31972500  | 0.00000500  |
| H | 3.46214500  | 0.62822800  | 0.00001100  |
| N | 2.01064000  | -0.92756000 | -0.00000100 |
| C | -1.47573700 | -1.54351500 | 0.00000600  |
| H | -2.24783000 | -2.30658800 | 0.00001800  |
| N | -1.93749400 | -0.24815400 | -0.00000100 |
| H | -2.93440400 | -0.07455200 | 0.00000700  |
| C | -1.12651300 | 0.91230200  | -0.00002300 |
| O | -1.59618200 | 2.03683800  | 0.00001200  |

### Coordinates of **23**

FM

0 1

|   |             |             |             |
|---|-------------|-------------|-------------|
| N | 2.19614200  | 0.51049100  | 0.00000000  |
| H | 2.74291300  | 1.35709500  | -0.00000100 |
| C | 0.81904000  | 0.43516900  | 0.00000000  |
| C | 0.51702200  | -0.92634300 | 0.00000000  |
| N | -0.74822000 | -1.43362700 | 0.00000000  |
| C | 2.64295500  | -0.77629000 | 0.00000000  |
| H | 3.69679500  | -1.01220500 | 0.00000000  |
| N | 1.67204500  | -1.66699800 | 0.00000000  |
| C | -1.69091300 | -0.53331700 | 0.00000000  |
| N | -1.46075300 | 0.82954500  | 0.00000000  |
| N | -2.99566500 | -0.92927700 | -0.00000100 |
| H | -3.76528500 | -0.28604400 | 0.00000300  |
| H | -2.23298700 | 1.48270500  | 0.00000000  |
| C | -0.18156600 | 1.44931900  | 0.00000100  |
| O | -0.06901300 | 2.66434600  | 0.00000000  |
| H | -3.17340000 | -1.91848200 | 0.00000200  |

### Coordinates of **24**

0 2

|   |             |             |            |
|---|-------------|-------------|------------|
| N | -2.73310400 | -0.68309500 | 0.98304300 |
| H | -3.19219000 | -1.05607200 | 1.79762300 |

|   |             |             |             |
|---|-------------|-------------|-------------|
| C | -1.62894800 | 0.16130000  | 0.98789400  |
| C | -1.35186400 | 0.37701100  | -0.34501000 |
| N | -0.40602200 | 1.18862100  | -0.98528100 |
| H | -1.16754800 | 0.51596900  | 1.88957400  |
| C | -3.06071600 | -0.92155000 | -0.31050000 |
| H | -3.88732600 | -1.55216300 | -0.59925900 |
| N | -2.24888500 | -0.29951000 | -1.13819700 |
| C | 0.93583700  | 1.43693200  | -0.50320000 |
| H | 1.33417700  | 2.22875900  | -1.15356800 |
| N | 1.87065600  | 0.33252200  | -0.70667100 |
| N | 0.84829000  | 1.87044800  | 0.89924100  |
| H | 1.76796000  | 2.15190600  | 1.22344300  |
| H | 2.83812900  | 0.64428600  | -0.68836100 |
| C | 1.74044300  | -0.93903700 | 0.03060500  |
| O | 2.46574300  | -1.94111000 | -0.63531500 |
| H | 0.23399600  | 2.67860000  | 0.96173300  |
| H | -0.42342900 | 1.00912300  | -1.98062300 |
| H | 0.68318500  | -1.21523800 | 0.02252500  |
| N | 2.30159100  | -0.72939800 | 1.32965600  |
| H | 3.26410100  | -2.06952800 | -0.10865200 |
| H | 1.58681300  | -0.25181000 | 1.88681700  |

#### Coordinates of **25**

FM

0 1

|   |             |             |             |
|---|-------------|-------------|-------------|
| N | 2.44463500  | 0.59946300  | 0.89626000  |
| H | 2.91485900  | 1.09352100  | 1.63688200  |
| C | 1.29523000  | -0.16236200 | 1.03223300  |
| C | 1.00710000  | -0.58523100 | -0.24436900 |
| N | -0.02478400 | -1.41376200 | -0.71307600 |
| H | 0.80596500  | -0.32738600 | 1.97413400  |
| C | 2.79187300  | 0.58857100  | -0.41615800 |
| H | 3.65996200  | 1.10489100  | -0.79556700 |
| N | 1.94298600  | -0.11537500 | -1.13426400 |
| C | -1.41341600 | -1.17203100 | -0.33459600 |
| H | -1.99217200 | -1.82630600 | -1.00237400 |
| N | -1.95493600 | 0.17041300  | -0.56037200 |
| N | -1.56293100 | -1.49421600 | 1.07448700  |
| H | -2.54070300 | -1.46685300 | 1.34339500  |
| H | -2.13954400 | 0.38369900  | -1.53182100 |
| C | -1.74392500 | 1.26982100  | 0.25739700  |
| H | -1.19738900 | -2.42494000 | 1.24052300  |
| H | 0.07743900  | -1.52877500 | -1.71342000 |
| H | -1.43109700 | 0.99582000  | 1.26100300  |
| N | -1.92553300 | 2.50178300  | -0.01823800 |
| H | -2.21454600 | 2.62558000  | -0.99337800 |

#### Coordinates of **26**

FM

0 2

|   |             |             |             |
|---|-------------|-------------|-------------|
| N | 2.55495700  | 0.67956900  | 0.90879500  |
| H | 3.04711400  | 1.09384900  | 1.68287800  |
| C | 1.44827200  | -0.15292600 | 1.00161500  |
| C | 1.12064900  | -0.44191400 | -0.30385000 |
| N | 0.13169800  | -1.27994900 | -0.83509500 |
| H | 0.99951300  | -0.43649600 | 1.93487600  |
| C | 2.84396600  | 0.83224400  | -0.40859300 |
| H | 3.67143900  | 1.42866000  | -0.76080900 |
| N | 1.99788500  | 0.17042600  | -1.16849500 |
| C | -1.24343900 | -1.30425600 | -0.34040700 |
| H | -1.74829200 | -2.02889700 | -0.99572400 |
| N | -2.05507300 | -0.09611400 | -0.44599800 |
| N | -1.21053600 | -1.70853000 | 1.05823700  |
| H | -2.15818900 | -1.80162600 | 1.40698400  |
| H | -2.34074700 | 0.09019700  | -1.40087100 |
| C | -1.72209100 | 1.09357000  | 0.22148000  |
| H | -0.73858500 | -2.60279200 | 1.13760400  |
| H | 0.17064100  | -1.23873300 | -1.84537900 |
| H | -1.29278500 | 0.96566300  | 1.21158100  |
| N | -2.61752000 | 2.14669000  | -0.07803800 |
| H | -3.58375200 | 1.96150400  | 0.20372800  |
| H | -2.32037400 | 3.02372200  | 0.32780900  |

### Coordinates of 27

FM

0 2

|   |             |             |             |
|---|-------------|-------------|-------------|
| N | 1.97659700  | 0.25312800  | 0.88073100  |
| H | 2.37530300  | 0.33986200  | 1.80492600  |
| C | 0.51588600  | 0.12599100  | 0.80161800  |
| C | 0.40873800  | -0.93352400 | -0.26115500 |
| N | -0.83304900 | -1.23658200 | -0.77844000 |
| H | 0.05520100  | -0.17425500 | 1.75054000  |
| C | 2.51258000  | -0.74734000 | 0.03665200  |
| H | 3.57527400  | -0.88040800 | -0.08695600 |
| N | 1.57992100  | -1.38036300 | -0.68367700 |
| C | -1.91320900 | -0.34132000 | -0.33041600 |
| H | -2.69667300 | -0.39619300 | -1.09817200 |
| N | -1.56060700 | 1.06358200  | -0.19594800 |
| N | -2.33493800 | -0.81673100 | 0.98255300  |
| H | -3.09242100 | -0.23791000 | 1.32771100  |
| H | -1.72950400 | 1.57634600  | -1.05262900 |
| C | -0.20930400 | 1.41740400  | 0.28095700  |
| H | -2.63339300 | -1.78488500 | 0.93403900  |
| H | -0.84345300 | -1.51128700 | -1.75151200 |
| H | -0.28731300 | 2.13416900  | 1.10696900  |
| N | 0.49416900  | 2.10097700  | -0.79974500 |
| H | 1.35564800  | 2.49835600  | -0.43549100 |
| H | 0.77853000  | 1.42086700  | -1.50368300 |

## Coordinates of **28**

FM

0 1

|   |             |             |             |
|---|-------------|-------------|-------------|
| N | 1.95256900  | 0.22351300  | 0.86401200  |
| H | 2.42539200  | 0.47243300  | 1.71945100  |
| C | 0.49970000  | 0.12354200  | 0.78067300  |
| C | 0.35579800  | -0.87524800 | -0.36153900 |
| N | -0.73862400 | -1.09973200 | -0.97037200 |
| H | 0.04852200  | -0.26555300 | 1.69651300  |
| C | 2.45951800  | -0.74081300 | 0.02737800  |
| H | 3.52897000  | -0.91994000 | -0.00037500 |
| N | 1.61908100  | -1.37460100 | -0.72475300 |
| C | -1.86388100 | -0.37671900 | -0.35851400 |
| H | -2.66567900 | -0.35431600 | -1.10600100 |
| N | -1.61148900 | 1.02745000  | 0.00044300  |
| N | -2.24339800 | -1.09461900 | 0.86398700  |
| H | -3.06975000 | -0.65717500 | 1.25990000  |
| H | -1.92916800 | 1.64366600  | -0.73759300 |
| C | -0.24429500 | 1.41861700  | 0.34564100  |
| H | -2.46466100 | -2.05983200 | 0.63721300  |
| H | -0.26075500 | 2.11697100  | 1.19022400  |
| N | 0.36138400  | 2.13477500  | -0.77377000 |
| H | 1.27206700  | 2.50201400  | -0.51413900 |
| H | 0.49736000  | 1.50795600  | -1.56385300 |

## Coordinates of **29**

FM

0 2

|   |             |             |             |
|---|-------------|-------------|-------------|
| N | 1.97050200  | 0.63269000  | 0.42048600  |
| H | 2.37431800  | 1.49613500  | 0.74804500  |
| C | 0.65063700  | 0.40156400  | 0.14925100  |
| C | 0.58285100  | -0.94799600 | -0.26576700 |
| N | -0.52145800 | -1.60731000 | -0.56900700 |
| C | 2.65088300  | -0.54454200 | 0.13949100  |
| H | 3.72250500  | -0.61125100 | 0.26101300  |
| N | 1.87364500  | -1.49766500 | -0.27248900 |
| C | -1.73428800 | -0.79766500 | -0.35601000 |
| H | -2.44839500 | -1.12318200 | -1.12420000 |
| N | -1.64483200 | 0.65648300  | -0.49183100 |
| N | -2.17773600 | -1.07670100 | 1.01225500  |
| H | -3.14456100 | -0.78407200 | 1.11736100  |
| H | -1.55869300 | 0.91617300  | -1.46948500 |
| C | -0.54216300 | 1.29943600  | 0.25169000  |
| H | -2.12085700 | -2.07517000 | 1.18503100  |
| H | -0.85580500 | 1.36562500  | 1.30002700  |
| N | -0.32971300 | 2.64723300  | -0.26022100 |
| H | -0.28334200 | 3.34743900  | 0.46560000  |

H 0.47444900 2.72040800 -0.86967300

### Coordinates of **30**

FM

0 1

|   |             |             |             |
|---|-------------|-------------|-------------|
| N | 2.09441800  | 0.83823000  | 0.30185500  |
| H | 2.61612500  | 1.65284600  | 0.57569100  |
| C | 0.71617200  | 0.73885000  | 0.07927600  |
| C | 0.48428600  | -0.66925800 | -0.21615400 |
| N | -0.65476200 | -1.19616200 | -0.51010400 |
| C | 2.59011200  | -0.43189900 | 0.14537400  |
| H | 3.64706000  | -0.62388700 | 0.27977700  |
| N | 1.71784300  | -1.34443500 | -0.16269600 |
| C | -1.82058300 | -0.34110000 | -0.35108300 |
| H | -2.52429500 | -0.56968500 | -1.15620300 |
| N | -1.51590500 | 1.10713500  | -0.45008500 |
| N | -2.54738000 | -0.57788300 | 0.89847100  |
| H | -2.96983700 | -1.50199700 | 0.86060600  |
| H | -2.32423800 | 1.69979600  | -0.33434200 |
| C | -0.30237200 | 1.61385300  | -0.06910300 |
| H | -1.88609200 | -0.59805200 | 1.67195600  |
| H | -0.22390800 | 2.69009700  | 0.03057900  |

### Coordinates of **31**

### Coordinates of **32**

0 1

|   |             |             |            |
|---|-------------|-------------|------------|
| C | -0.23437600 | 0.70133600  | 0.00000000 |
| C | -0.21695400 | -0.71461300 | 0.00000000 |
| C | 2.01794100  | -0.66554700 | 0.00000000 |
| C | 0.97610600  | 1.37969300  | 0.00000000 |
| C | -2.26577300 | -0.14987000 | 0.00000000 |
| H | 2.96313100  | -1.19880000 | 0.00000000 |
| H | -3.34643000 | -0.16324200 | 0.00000000 |
| N | -1.50604000 | -1.21242400 | 0.00000000 |
| N | -1.57229200 | 1.03865800  | 0.00000000 |
| H | -1.97059800 | 1.96398600  | 0.00000000 |
| N | 0.91775300  | -1.41489100 | 0.00000000 |
| N | 2.10886800  | 0.67840000  | 0.00000000 |
| H | 1.05421500  | 2.46387300  | 0.00000000 |

### Coordinates of **33**

FM

0 1

|   |            |             |             |
|---|------------|-------------|-------------|
| N | 1.42489200 | -1.22709000 | -0.25810800 |
|---|------------|-------------|-------------|

|   |             |             |             |
|---|-------------|-------------|-------------|
| H | 1.48897700  | -2.21296400 | -0.45533000 |
| C | 0.28074300  | -0.45729400 | -0.21043400 |
| C | 0.70982100  | 0.81753400  | 0.08733800  |
| N | -0.12695300 | 1.91566500  | 0.22082700  |
| C | 2.47230200  | -0.38113500 | 0.00871100  |
| H | 3.49372900  | -0.72989000 | 0.03208300  |
| N | 2.07938100  | 0.85102400  | 0.22277400  |
| C | -1.36250700 | 1.63200500  | -0.00141600 |
| H | -2.11054000 | 2.41754700  | 0.07753900  |
| N | -1.87707800 | 0.41128500  | -0.36967200 |
| H | -2.88132800 | 0.31685500  | -0.39077900 |
| C | -1.14590500 | -0.85924800 | -0.38253900 |
| H | -1.31768700 | -1.36301700 | -1.34600800 |
| N | -1.71992200 | -1.76066400 | 0.62720700  |
| H | -1.50600600 | -2.73115400 | 0.42111800  |
| H | -1.35611500 | -1.54009000 | 1.55022800  |

#### Coordinates of **34**

FM

0 2

|   |             |             |             |
|---|-------------|-------------|-------------|
| N | 1.31578200  | -1.35061700 | 0.00000000  |
| H | 1.31671800  | -2.35566200 | 0.00000100  |
| C | 0.21757200  | -0.50707800 | 0.00000000  |
| C | 0.78641400  | 0.80294400  | 0.00000000  |
| N | 0.01325800  | 1.94778000  | 0.00000000  |
| C | 2.45263500  | -0.52987400 | 0.00000100  |
| H | 3.44771100  | -0.94398400 | 0.00000100  |
| N | 2.14101400  | 0.74660100  | -0.00000200 |
| C | -1.25551300 | 1.75548900  | 0.00000000  |
| H | -1.93499100 | 2.60299200  | 0.00000200  |
| N | -1.88762100 | 0.51690500  | -0.00000100 |
| H | -2.89294200 | 0.48571400  | 0.00000800  |
| C | -1.14363100 | -0.69305600 | 0.00000000  |
| N | -1.86881900 | -1.87724400 | 0.00000000  |
| H | -2.87108400 | -1.87845100 | -0.00001200 |
| H | -1.40556600 | -2.76513300 | 0.00000300  |

#### Coordinates of **35**

FM

0 1

|   |             |             |             |
|---|-------------|-------------|-------------|
| N | 1.27089800  | -1.34467800 | 0.00000000  |
| H | 1.27006400  | -2.35108500 | 0.00000100  |
| C | 0.18327400  | -0.48447800 | 0.00000000  |
| C | 0.73720900  | 0.80773100  | 0.00000000  |
| N | -0.00437400 | 1.92725200  | 0.00000000  |
| C | 2.38596200  | -0.54262200 | 0.00000000  |
| H | 3.37929800  | -0.96828400 | 0.00000000  |
| N | 2.11787000  | 0.73585100  | -0.00000100 |

|   |             |             |             |
|---|-------------|-------------|-------------|
| C | -1.30750000 | 1.68819800  | 0.00000000  |
| H | -1.95857700 | 2.55751400  | 0.00000000  |
| N | -1.94514700 | 0.50230700  | 0.00000000  |
| C | -1.21489200 | -0.61537700 | 0.00000000  |
| N | -1.88097700 | -1.80510300 | -0.00000100 |
| H | -1.41636100 | -2.69355100 | 0.00000200  |
| H | -2.88663500 | -1.77471000 | 0.00000100  |

### List of coordinates files for transition states

#### Coordinates for TS 1→2

FM

0 2

|   |             |             |             |
|---|-------------|-------------|-------------|
| N | 1.22960500  | -0.15198000 | -0.25730900 |
| H | 1.29172400  | -1.14778400 | -0.09976400 |
| H | 1.95906800  | 0.42723700  | 0.12800000  |
| C | 0.00906400  | 0.37371700  | -0.49379700 |
| H | 0.00927000  | 1.46550800  | -0.60010300 |
| O | -0.94649000 | -0.33283000 | -0.95291600 |
| C | -1.13304600 | 0.46900800  | 1.20089900  |
| N | -1.59012400 | 0.55475900  | 2.26580600  |

#### Coordinates for TS 2→3

FM

0 2

|   |             |             |             |
|---|-------------|-------------|-------------|
| N | 1.15991000  | -1.10930900 | 0.05145400  |
| H | 1.96440200  | -1.01390200 | 0.67945800  |
| C | 0.30832400  | 0.07780400  | 0.24225100  |
| H | 0.44271800  | 0.60900700  | 1.18766800  |
| O | 0.95855300  | 0.69943900  | -0.84304000 |
| C | -1.11880500 | -0.20224900 | 0.01834100  |
| N | -2.24336800 | -0.39195400 | -0.14186300 |
| H | 1.41255600  | -0.44043800 | -1.02041900 |

#### Coordinates for TS 3→4

FM

0 2

|   |             |             |             |
|---|-------------|-------------|-------------|
| N | -1.03749300 | 1.00181100  | -0.34915100 |
| H | -1.98573600 | 1.03733500  | 0.02992100  |
| C | -0.27194100 | 0.35751700  | 0.47735600  |
| H | -0.55388500 | 0.05247600  | 1.48475600  |
| O | -0.95201300 | -1.44224000 | -0.24520900 |
| C | 1.14355200  | 0.26361700  | 0.19523900  |
| N | 2.27964200  | 0.19404000  | 0.01226000  |



|   |             |             |             |
|---|-------------|-------------|-------------|
| H | -0.74457800 | -1.30609600 | -1.18712700 |
|---|-------------|-------------|-------------|

Coordinates for TS 4→5

FM

0 2

|   |             |             |             |
|---|-------------|-------------|-------------|
| N | 1.50548900  | -0.72917700 | 0.02192700  |
| C | 0.63800800  | 0.09478200  | -0.44753900 |
| H | 0.84286500  | 0.87060700  | -1.19079500 |
| C | -0.77139200 | -0.13372800 | -0.19936400 |
| N | -1.90327300 | -0.29451200 | -0.04925100 |
| H | 2.44008600  | -0.46801100 | -0.29926700 |
| H | 0.69691500  | 1.61049600  | 0.76352400  |

Coordinates for TS 5→6

FM

0 2

|   |             |             |             |
|---|-------------|-------------|-------------|
| N | -0.06860500 | -0.47710900 | -0.56087900 |
| H | -0.39141900 | -0.29121900 | -1.51362500 |
| C | -0.53486900 | 0.61389100  | 0.29422100  |
| H | -0.23872600 | 1.57254700  | -0.14707000 |
| C | 0.05394200  | 0.52401100  | 1.63446800  |
| N | 0.50747900  | 0.45761000  | 2.69124200  |
| H | -1.62733800 | 0.62059900  | 0.38632900  |
| C | -0.80408200 | -2.06451000 | -0.18264100 |
| H | -0.62102100 | -2.05448900 | 0.90214100  |
| N | -0.10525200 | -3.09157800 | -0.81012500 |
| H | 0.86320100  | -3.18732200 | -0.53706900 |
| H | -0.24838500 | -3.13233100 | -1.81079900 |
| O | -1.95221900 | -1.72233300 | -0.63751300 |

Coordinates for TS 6→7

FM

0 2

|   |             |             |             |
|---|-------------|-------------|-------------|
| N | -0.22989500 | -0.28691800 | -0.64204000 |
| H | 0.22081500  | -0.81694700 | -1.38125900 |
| C | -1.01962900 | -1.17879800 | 0.20907700  |
| H | -1.57133800 | -1.86875000 | -0.43360100 |
| C | -1.99968100 | -0.43009100 | 1.00686400  |
| N | -2.75616200 | 0.15492100  | 1.64916300  |
| H | -0.41167800 | -1.78434200 | 0.89651700  |
| C | 0.74814200  | 0.48881900  | 0.05385600  |
| H | 0.26034500  | 1.15769400  | 0.76620700  |
| N | 1.69701900  | 1.10537900  | -0.87317400 |
| H | 1.97504300  | 2.01665500  | -0.50011100 |
| O | 1.83210000  | -0.21645600 | 0.65781300  |

H 2.43968500 0.21293900 -0.33790800

Coordinates for TS 7→8

FM

0 2

N -0.24193900 -0.39205100 0.87491900  
H -0.62965400 -1.12540700 1.45141500  
C 1.16711600 -0.55555200 0.56626700  
H 1.76486700 -0.45903300 1.47571400  
C 1.52488200 0.53741400 -0.36881000  
N 2.19357600 1.41396200 -0.77643200  
H 1.42658700 -1.50379800 0.07121900  
C -1.05836700 -0.03729600 -0.26503400  
H -1.66600500 -0.89867500 -0.60527200  
N -0.17723400 0.26704000 -1.36751800  
H -0.36645800 1.22087200 -1.68447700  
O -1.93419700 1.00177100 0.14138600  
H -2.68954600 1.00348300 -0.45682000

Coordinates for TS 8-NH<sub>3</sub>→9

FM

0 2

N 0.70569200 0.93059700 -0.84123500  
H 0.62825700 0.81933400 -1.84625400  
C -0.59824900 1.33690600 -0.28448800  
H -0.46990700 2.00866900 0.56672500  
C -1.23355900 0.03571900 0.21632900  
N -2.40661700 -0.05152200 0.70098100  
H -1.21952000 1.83745900 -1.02635900  
C 1.00508200 -0.36699300 -0.24853100  
H 1.56625800 -0.98800700 -0.95656700  
N -0.28279800 -0.94376400 0.04885600  
H -0.40533200 -1.81083700 0.56312400  
O 1.72740300 -0.22233100 0.96084000  
H 2.46561200 0.36857800 0.77119400  
H -2.54565100 -1.13443600 1.07823300  
N -2.35608300 -2.45778100 1.48104700  
H -2.66048600 -2.34856100 2.45420800  
H -3.16921000 -2.87115100 1.01216200

Coordinates for TS 9→10-NH<sub>3</sub>

FM

0 2

N -0.17332800 1.31735400 -0.59186700  
H -0.78649200 1.75409700 -1.27064400  
C -0.78089100 1.36617200 0.75281900

|   |             |             |             |
|---|-------------|-------------|-------------|
| H | -0.01910900 | 1.51944800  | 1.52157700  |
| C | -1.42394500 | -0.00306600 | 0.93148200  |
| N | -2.17906700 | -0.29648600 | 1.91974400  |
| H | -1.51389300 | 2.16768800  | 0.83936600  |
| C | -0.03089900 | -0.09483400 | -0.90550600 |
| H | -0.15963800 | -0.26400300 | -1.98014600 |
| N | -1.05914400 | -0.79607700 | -0.14973700 |
| O | 1.24517100  | -0.57262900 | -0.48778800 |
| H | 1.88406200  | 0.08984100  | -0.77687800 |
| N | -0.19164500 | -2.97742800 | 0.52995400  |
| H | -0.09851100 | -2.84882700 | 1.54065500  |
| H | 0.75875100  | -2.88202800 | 0.16387100  |
| H | -2.51295400 | -1.25960600 | 1.84537200  |
| H | -0.83942900 | -1.99973700 | 0.06981500  |

### Coordinates for TS 10→11

FM

0 2

|   |             |             |             |
|---|-------------|-------------|-------------|
| N | -0.90106500 | 1.31161800  | -0.95047100 |
| H | -0.63955200 | 2.06613700  | -1.56633000 |
| C | -1.32970300 | 1.56391200  | 0.42789300  |
| H | -0.72257200 | 2.33914600  | 0.90413400  |
| C | -1.04322500 | 0.20415000  | 1.05930100  |
| N | -1.43487600 | -0.13343300 | 2.22163800  |
| H | -2.38425400 | 1.83310700  | 0.49212200  |
| C | -0.18649800 | 0.16089900  | -0.94663200 |
| H | 0.24414200  | -0.21929200 | -1.86086900 |
| N | -0.31993400 | -0.58573700 | 0.15022800  |
| O | 1.66639300  | 0.68447600  | -0.18329100 |
| H | 2.01893100  | -0.14301900 | 0.17952600  |
| H | -1.11266600 | -1.08335600 | 2.41973900  |

### Coordinates for TS 11→12

FM

0 2

|   |             |             |             |
|---|-------------|-------------|-------------|
| N | -0.97862000 | 0.86319300  | -0.07314500 |
| H | -1.70652600 | 1.44874800  | -0.47713800 |
| C | 0.31283900  | 1.40409600  | 0.22980300  |
| C | 1.13093000  | 0.14285500  | 0.35103900  |
| N | 2.34921700  | 0.11895700  | 0.74758100  |
| H | 0.33179600  | 2.06406800  | 1.09870900  |
| C | -0.84427300 | -0.46569900 | -0.27218600 |
| H | -1.68021400 | -1.06537000 | -0.61020400 |
| N | 0.34635400  | -0.95312900 | -0.02971600 |
| H | 2.67689600  | -0.85053100 | 0.76691800  |
| C | -0.31858800 | 3.22529000  | -1.84066900 |
| N | -1.48621200 | 3.22513200  | -1.84076600 |
| H | 0.61652500  | 2.06819400  | -0.64965600 |

### Coordinates for TS 12→14

FM

0 2

|   |             |             |             |
|---|-------------|-------------|-------------|
| N | -2.68203600 | 0.74383200  | -0.97475300 |
| H | -3.26889000 | 1.32463000  | -1.55159700 |
| C | -1.37321300 | 0.40727500  | -1.23170700 |
| C | -0.98502500 | -0.38566100 | -0.15929400 |
| N | 0.23410400  | -0.98549800 | 0.02786200  |
| H | -0.85185500 | 0.73537600  | -2.11420600 |
| C | -3.03364300 | 0.14840000  | 0.20613000  |
| H | -4.02131100 | 0.24995000  | 0.62998400  |
| N | -2.04280300 | -0.52925200 | 0.72391700  |
| C | 1.70655100  | 0.08215900  | 0.22952700  |
| N | 1.51510800  | 0.54620600  | 1.47696400  |
| H | 2.01831800  | -0.05446500 | 2.13903600  |
| H | 0.18791300  | -1.51553700 | 0.89923100  |
| H | 1.45124400  | 0.78426800  | -0.56291000 |
| N | 2.83033800  | -0.69986100 | -0.11074700 |
| H | 3.05132200  | -1.38927300 | 0.59977100  |
| H | 2.71353800  | -1.16513300 | -1.00375800 |

### Coordinates for TS 14→15

FM

0 2

|   |             |             |             |
|---|-------------|-------------|-------------|
| N | 3.11254600  | -0.91330000 | 0.50171900  |
| H | 3.64684300  | -1.60120500 | 1.00642600  |
| C | 1.73561800  | -0.74117100 | 0.57081300  |
| C | 1.47202100  | 0.30362100  | -0.28939600 |
| N | 0.25543400  | 0.88900900  | -0.63955000 |
| H | 1.09502300  | -1.37349900 | 1.15787400  |
| C | 3.59514800  | 0.00049600  | -0.37698600 |
| H | 4.64319800  | 0.07859200  | -0.62218000 |
| N | 2.63610800  | 0.75830800  | -0.86551200 |
| C | -0.74489300 | 1.18018700  | 0.38757300  |
| N | -1.28894000 | -0.08120400 | 0.87784800  |
| H | -1.57727100 | 0.06331900  | 1.84720900  |
| C | -2.78415800 | -0.63017600 | 0.05501000  |
| H | -2.68011600 | -1.69822700 | 0.29112200  |
| O | -3.53832700 | 0.11840200  | 0.77098700  |
| H | 0.40869000  | 1.66498300  | -1.26949600 |
| H | -1.53954000 | 1.73643800  | -0.11751000 |
| N | -0.30923000 | 1.97745700  | 1.53471400  |
| H | 0.55915600  | 1.59625700  | 1.90321900  |
| H | -0.11090300 | 2.92758900  | 1.23742900  |
| N | -2.69029300 | -0.35695800 | -1.31127700 |
| H | -2.47541500 | -1.11920400 | -1.93283300 |
| H | -3.36264200 | 0.31357400  | -1.64858200 |

### Coordinates for TS 15→16

FM

0 2

|   |             |             |             |
|---|-------------|-------------|-------------|
| N | 2.77107600  | -1.12362300 | 1.02025100  |
| H | 3.19515300  | -1.73473100 | 1.69872200  |
| C | 1.40874100  | -0.90452900 | 0.86420700  |
| C | 1.31981700  | -0.01022800 | -0.18033000 |
| N | 0.19282200  | 0.54123800  | -0.80059900 |
| H | 0.66264000  | -1.40247800 | 1.45572600  |
| C | 3.41556500  | -0.37920800 | 0.08713700  |
| H | 4.48988900  | -0.37005700 | -0.01383700 |
| N | 2.57156400  | 0.31317800  | -0.64848500 |
| C | -0.93916500 | 1.00646700  | 0.00475100  |
| N | -1.65364800 | -0.15419900 | 0.52191800  |
| H | -2.27757000 | 0.08419800  | 1.28338800  |
| C | -2.19294500 | -1.08541600 | -0.36313400 |
| H | -1.50990100 | -1.29927500 | -1.19354200 |
| O | -3.02517500 | -1.94873700 | 0.05026200  |
| H | 0.47986500  | 1.21903700  | -1.49460500 |
| H | -1.56837400 | 1.57712900  | -0.68905500 |
| N | -0.66569600 | 1.85904200  | 1.15094700  |
| H | 0.04824900  | 1.43051500  | 1.73474400  |
| H | -0.30915900 | 2.75583900  | 0.83867600  |
| N | -3.48576300 | -0.21881700 | -1.39855000 |
| H | -3.79809700 | -0.92764900 | -2.06872500 |
| H | -4.27316500 | -0.11795700 | -0.74951900 |

### Coordinates for TS 16→18

FM

0 2

|   |             |             |             |
|---|-------------|-------------|-------------|
| N | -2.15531800 | 1.59312800  | -1.21573400 |
| H | -2.45087000 | 2.20867100  | -1.95628300 |
| C | -0.87539900 | 1.11353700  | -1.02699900 |
| C | -0.95642300 | 0.30928700  | 0.10523000  |
| N | 0.00346900  | -0.38089300 | 0.80244000  |
| H | -0.06537000 | 1.35510600  | -1.69019300 |
| C | -2.94264600 | 1.05181800  | -0.24218500 |
| H | -4.00143200 | 1.25149500  | -0.17671000 |
| N | -2.26035800 | 0.28511500  | 0.56929100  |
| C | 1.40524900  | -0.35652200 | 0.43799700  |
| N | 1.66816300  | -0.57928300 | -0.99069700 |
| H | 2.54029200  | -0.19414700 | -1.33070300 |
| C | 1.10046900  | -1.55829500 | -1.75612800 |
| H | 0.23989800  | -2.03952500 | -1.25856300 |
| O | 1.47253400  | -1.86204200 | -2.86982400 |
| H | -0.32951400 | -1.37417100 | 1.31375100  |
| H | 1.86661100  | -1.14951900 | 1.03654900  |

|   |             |             |            |
|---|-------------|-------------|------------|
| N | 2.09103300  | 0.88156900  | 0.78027300 |
| H | 1.57170300  | 1.67694100  | 0.41854000 |
| H | 2.11633900  | 0.97709400  | 1.79013800 |
| N | -0.72001400 | -2.66369700 | 1.52272200 |
| H | -1.70260200 | -2.69465000 | 1.23812300 |
| H | -0.24852200 | -3.36009000 | 0.94054900 |

Coordinates for TS **18**→**19**

FM

0 2

|   |             |             |             |
|---|-------------|-------------|-------------|
| N | 1.47541000  | 0.88794700  | -0.20493800 |
| H | 2.30296600  | 1.45330200  | -0.11493900 |
| C | 0.29973000  | 1.27678200  | -0.89555600 |
| C | -0.55907900 | 0.02321500  | -0.75684000 |
| N | -1.81048000 | -0.06749600 | -0.96133500 |
| H | 0.47894900  | 1.65493000  | -1.89917000 |
| C | 1.34516400  | -0.42987000 | 0.14138600  |
| H | 2.14704000  | -0.94151300 | 0.65984300  |
| N | 0.22252700  | -0.99387900 | -0.17125100 |
| C | -2.56676100 | 1.15380300  | -1.28289800 |
| N | -1.85146400 | 2.41988400  | -1.08354200 |
| H | -1.78388600 | 2.98022100  | -1.92449000 |
| C | -0.69298100 | 2.51590700  | -0.25299500 |
| H | -0.89754800 | 2.14509600  | 0.76828600  |
| O | 0.05137800  | 3.56796500  | -0.34658800 |
| H | -3.42813500 | 1.12162000  | -0.60809700 |
| N | -3.08121400 | 1.14542700  | -2.64340800 |
| H | -2.36256800 | 0.80098000  | -3.27499000 |
| H | -3.85939600 | 0.49802600  | -2.70858400 |

Coordinates for TS **19**→**20**

FM

0 2

|   |             |             |             |
|---|-------------|-------------|-------------|
| N | 1.37978400  | 0.95737500  | -0.00437200 |
| H | 2.22109600  | 1.50402400  | 0.08714800  |
| C | 0.28319500  | 1.34519700  | -0.86791200 |
| C | -0.52507500 | 0.04869800  | -0.87695400 |
| N | -1.76651300 | -0.05418200 | -1.12115600 |
| H | 0.64810900  | 1.56438400  | -1.88186400 |
| C | 1.35155800  | -0.41011900 | 0.04872100  |
| H | 2.16895500  | -0.95010600 | 0.51298900  |
| N | 0.30248400  | -0.99812800 | -0.43572700 |
| C | -2.54011500 | 1.15255900  | -1.34909600 |
| N | -1.81389000 | 2.41566700  | -1.10542200 |
| H | -2.39358100 | 3.24485200  | -1.08521300 |
| C | -0.58743600 | 2.54098900  | -0.48230500 |
| H | -0.90137000 | 1.99442300  | 1.04182600  |
| O | -0.11697600 | 3.62097400  | -0.10175800 |

|   |             |            |             |
|---|-------------|------------|-------------|
| H | -3.37410800 | 1.09900700 | -0.63804600 |
| N | -3.13329800 | 1.24406900 | -2.67247800 |
| H | -2.39995600 | 1.18599700 | -3.37486600 |
| H | -3.74518100 | 0.44514900 | -2.81319100 |

Coordinates for TS **21**→**22**

FM

0 2

|   |             |             |             |
|---|-------------|-------------|-------------|
| N | 1.32121300  | 0.68706200  | -0.78796700 |
| H | 2.11787400  | 1.13845000  | -1.20751800 |
| C | -0.03333300 | 1.04662000  | -1.00063000 |
| C | -0.74673500 | 0.07143400  | -0.09707000 |
| N | -1.99432800 | 0.14110600  | 0.18618500  |
| H | -0.42362200 | 0.78342300  | -2.10486500 |
| C | 1.32786500  | -0.44001400 | -0.02363200 |
| H | 2.25940700  | -0.94143900 | 0.20711300  |
| N | 0.16651400  | -0.85300600 | 0.39971900  |
| C | -2.66539000 | 1.26906700  | -0.45452500 |
| N | -1.85218600 | 2.48304000  | -0.57195600 |
| H | -2.25264100 | 3.36862200  | -0.29732800 |
| C | -0.49314200 | 2.46675100  | -0.76488000 |
| O | 0.22952500  | 3.43792000  | -0.73892400 |
| H | -3.53046500 | 1.54180400  | 0.15948800  |
| N | -3.06127800 | 0.81744100  | -1.78524700 |
| H | -3.57106000 | -0.05666900 | -1.79137700 |
| C | -1.25932300 | 0.44933600  | -3.42567800 |
| N | -1.39957000 | 0.20614100  | -4.55531700 |
| H | -3.46455900 | 1.52167100  | -2.38862600 |

Coordinates for TS **21**→**22**

FM

0 2

|   |             |             |             |
|---|-------------|-------------|-------------|
| N | 1.42589800  | 0.95454700  | -0.04032100 |
| H | 2.14711200  | 1.61419300  | 0.20953600  |
| C | 0.10775100  | 1.25454400  | -0.25721500 |
| C | -0.51154100 | 0.04034600  | -0.56039400 |
| N | -1.83644000 | -0.09265300 | -0.82289100 |
| C | 1.54457400  | -0.39941800 | -0.21927900 |
| H | 2.49233800  | -0.90443900 | -0.10682600 |
| N | 0.41107800  | -0.98191700 | -0.53240000 |
| C | -2.50380400 | 1.05864600  | -0.86135600 |
| N | -1.95498400 | 2.27228900  | -0.46300000 |
| H | -2.53700900 | 3.09820800  | -0.50478400 |
| C | -0.59871700 | 2.50599500  | -0.18866200 |
| O | -0.15198400 | 3.60960100  | 0.07252400  |
| H | -3.58339400 | 1.02308000  | -0.81256600 |
| N | -2.66159000 | 1.20606000  | -2.91545200 |
| H | -1.66997500 | 1.15051300  | -3.17703800 |

H -3.00757600 0.26646200 -3.14321900

Coordinates for TS **21**→**24**

FM

0 2

N 1.39238200 0.92692600 0.28713100  
H 2.00919500 1.57602500 0.75108000  
C 0.20754600 1.24512400 -0.32787200  
C -0.29513500 0.04158400 -0.82134200  
N -1.45176400 -0.06754300 -1.52643500  
C 1.54760300 -0.42352400 0.13863700  
H 2.40768400 -0.94274700 0.53438000  
N 0.56058100 -0.99052300 -0.51877000  
C -2.15552400 1.05469100 -1.59895000  
N -1.65204200 2.29737100 -1.21529200  
H -2.26998400 3.09699400 -1.26691900  
C -0.45980400 2.50344400 -0.49009900  
O -0.11814200 3.60560300 -0.09834500  
H -3.01093100 0.63063200 -0.14587900  
N -3.28763600 1.14212900 -2.42298900  
H -3.14761900 1.76927100 -3.20720000  
H -3.55047000 0.21953900 -2.74674200

Coordinates for TS **15**→**24**

FM

0 2

N -2.23283200 -1.13224100 1.17841900  
H -2.43910400 -1.75238500 1.94416500  
C -1.23611100 -0.16764300 1.16565600  
C -1.30362400 0.38166000 -0.09627400  
N -0.58604200 1.43046600 -0.68960600  
H -0.58260800 0.01191300 1.99721500  
C -2.84135200 -1.11189300 -0.03365900  
H -3.66115200 -1.76520400 -0.28918600  
N -2.30524800 -0.20965400 -0.82849300  
C 0.82399900 1.65787800 -0.46237800  
H 1.06605000 2.56909600 -1.02489700  
N 1.71167200 0.64090900 -1.02235600  
N 1.03126000 1.84094700 0.98692400  
H 1.95121300 2.24097500 1.14678700  
H 2.68784900 0.91858600 -0.99407000  
C 1.59983600 -0.74425300 -0.66197900  
O 2.77649100 -1.43894400 -1.01184700  
H 0.35013700 2.51280300 1.33239800  
H -0.82858300 1.49334500 -1.66962700  
H 0.68568500 -1.17890200 -1.06858500  
N 1.79074000 -1.18428900 0.75520400  
H 2.68077000 -1.86484600 0.14632600



H 2.23293700 -0.40233100 1.24847500

Coordinates for TS **24**→**25**

FM

0 2

|   |             |             |             |
|---|-------------|-------------|-------------|
| N | -2.57156800 | -0.90831600 | 0.76840200  |
| H | -3.09250200 | -1.28712500 | 1.54184700  |
| C | -1.58847400 | 0.07080500  | 0.85206800  |
| C | -1.16676300 | 0.24722200  | -0.44708400 |
| N | -0.24072000 | 1.13315500  | -1.01338700 |
| H | -1.29840500 | 0.53478500  | 1.77558800  |
| C | -2.69672900 | -1.25090700 | -0.53794000 |
| H | -3.39992500 | -1.99284800 | -0.88363600 |
| N | -1.86611900 | -0.57240800 | -1.29871800 |
| C | 0.94045800  | 1.62639500  | -0.34028900 |
| H | 1.37420600  | 2.35857500  | -1.03640800 |
| N | 2.06110100  | 0.70004700  | -0.08361600 |
| N | 0.54414900  | 2.19283600  | 0.93765900  |
| H | 1.34167300  | 2.62853700  | 1.38614400  |
| H | 2.71955800  | 0.63301500  | -0.84914400 |
| C | 1.93847200  | -0.45135000 | 0.65211300  |
| O | 1.29937800  | -1.77949900 | -0.68815200 |
| H | -0.18195000 | 2.88681200  | 0.79493600  |
| H | -0.06857900 | 0.87166300  | -1.97504200 |
| H | 1.08010300  | -0.46058200 | 1.31327700  |
| N | 2.91175300  | -1.31607900 | 0.89236100  |
| H | 1.18568500  | -2.58449800 | -0.16153800 |
| H | 3.68929800  | -1.14849300 | 0.24780100  |

Coordinates for TS **25**→**26**

FM

0 2

|   |             |             |             |
|---|-------------|-------------|-------------|
| N | 2.49212600  | 0.54098000  | 0.86866000  |
| H | 2.98992700  | 1.00682500  | 1.60968400  |
| C | 1.34489700  | -0.22094300 | 1.01726200  |
| C | 1.01284200  | -0.59939500 | -0.26257300 |
| N | -0.03970400 | -1.40700400 | -0.72398900 |
| H | 0.88748600  | -0.41638000 | 1.96939400  |
| C | 2.79580400  | 0.57313900  | -0.45428400 |
| H | 3.65326800  | 1.09885000  | -0.84468600 |
| N | 1.92014000  | -0.10295000 | -1.16696600 |
| C | -1.41378000 | -1.15583400 | -0.30742100 |
| H | -2.02139900 | -1.77740600 | -0.98024300 |
| N | -1.93241800 | 0.20577100  | -0.48408100 |
| N | -1.53941300 | -1.51013600 | 1.09513600  |
| H | -2.51113500 | -1.48282200 | 1.38542600  |
| H | -2.13788400 | 0.45092200  | -1.44363900 |
| C | -1.68763900 | 1.26486900  | 0.36481700  |

|   |             |             |             |
|---|-------------|-------------|-------------|
| H | -1.17623700 | -2.44629500 | 1.23293100  |
| H | 0.03754000  | -1.50251700 | -1.72864000 |
| H | -1.37186800 | 0.96229600  | 1.35681700  |
| N | -1.87992100 | 2.51623800  | 0.12898800  |
| H | -2.19329200 | 2.69186000  | -0.82754400 |
| H | -3.21333300 | 3.31570300  | 0.93681500  |

Coordinates for TS **26**→**27**

FM

0 2

|   |             |             |             |
|---|-------------|-------------|-------------|
| N | 1.66563500  | 1.26268300  | 0.70538600  |
| H | 1.92432300  | 1.89452500  | 1.44356700  |
| C | 0.78281000  | 0.18788300  | 0.83131500  |
| C | 0.85571600  | -0.41816200 | -0.44674300 |
| N | 0.05323600  | -1.48901500 | -0.84584100 |
| H | 0.64596000  | -0.30928400 | 1.77846700  |
| C | 2.09836700  | 1.31723100  | -0.60204000 |
| H | 2.75789400  | 2.08493200  | -0.97233300 |
| N | 1.59442800  | 0.31470600  | -1.31124900 |
| C | -1.27317100 | -1.54782300 | -0.20448300 |
| H | -1.90402500 | -2.13279800 | -0.88859200 |
| N | -1.95865400 | -0.28021500 | -0.01143100 |
| N | -1.09535200 | -2.16084900 | 1.10433000  |
| H | -1.99787200 | -2.29874600 | 1.54589000  |
| H | -2.38806300 | 0.05577800  | -0.86684100 |
| C | -1.30330700 | 0.78634400  | 0.68979100  |
| H | -0.62476000 | -3.05340300 | 1.00498700  |
| H | 0.00038600  | -1.53309500 | -1.85626600 |
| H | -1.59882100 | 0.89544200  | 1.73529300  |
| N | -1.37999400 | 2.01183900  | -0.02699100 |
| H | -1.12643300 | 2.80417600  | 0.55050300  |
| H | -0.77355300 | 2.00171200  | -0.84439300 |

Coordinates for TS **27**→**28**

FM

0 2

|   |             |             |             |
|---|-------------|-------------|-------------|
| N | 1.77851200  | -0.38702900 | 0.29905500  |
| H | 2.23480000  | -0.18939200 | 1.17640900  |
| C | 0.32678200  | -0.42238200 | 0.16147800  |
| C | 0.19173100  | -1.34992800 | -1.03737000 |
| N | -0.90056800 | -1.49223600 | -1.68533800 |
| H | -0.17318200 | -0.84241700 | 1.03739700  |
| C | 2.27993900  | -1.31502500 | -0.57652100 |
| H | 3.34194000  | -1.53403500 | -0.58292300 |
| N | 1.43983600  | -1.87013500 | -1.39328200 |
| C | -2.02002100 | -0.76412900 | -1.06443800 |
| H | -2.80410800 | -0.69324800 | -1.82697700 |
| N | -1.71469000 | 0.61295100  | -0.66339700 |

|   |             |             |             |
|---|-------------|-------------|-------------|
| N | -2.44184900 | -1.50636100 | 0.12687700  |
| H | -3.25916800 | -1.05298100 | 0.52376100  |
| H | -1.95988900 | 1.26333700  | -1.39957800 |
| C | -0.35224900 | 0.92648100  | -0.22557400 |
| H | -2.69073700 | -2.45556300 | -0.13844300 |
| H | -1.58181500 | -3.23026700 | -2.12257200 |
| H | -0.38571600 | 1.56920700  | 0.66140500  |
| N | 0.33049600  | 1.68718000  | -1.26641200 |
| H | 1.23201700  | 2.01983900  | -0.93851500 |
| H | 0.49519900  | 1.10571200  | -2.08503500 |

Coordinates for TS **28**→**29**

FM

0 2

|   |             |             |             |
|---|-------------|-------------|-------------|
| N | 1.99134800  | 0.15177900  | 0.79915800  |
| H | 2.48496300  | 0.50337600  | 1.60577900  |
| C | 0.56516000  | 0.08257900  | 0.70409300  |
| C | 0.39268900  | -0.90184400 | -0.41282100 |
| N | -0.72476500 | -1.13562100 | -0.99435700 |
| H | 0.07884300  | -0.41351300 | 1.68562200  |
| C | 2.49410300  | -0.82406300 | -0.02314000 |
| H | 3.55691400  | -1.03383600 | -0.03466500 |
| N | 1.63307500  | -1.44191400 | -0.77173400 |
| C | -1.84399400 | -0.42537400 | -0.35954100 |
| H | -2.65778000 | -0.38166800 | -1.09261700 |
| N | -1.59841100 | 0.95312300  | 0.05961400  |
| N | -2.23191300 | -1.20496200 | 0.81458300  |
| H | -2.92244200 | -0.74255000 | 1.39132100  |
| H | -1.96433100 | 1.61527400  | -0.61190100 |
| C | -0.24057000 | 1.37044500  | 0.42341500  |
| H | -2.46750000 | -2.16879100 | 0.61349500  |
| H | -0.27867800 | 1.98259100  | 1.33118500  |
| N | 0.30611200  | 2.21935100  | -0.63027200 |
| H | 1.15612100  | 2.68368800  | -0.32727200 |
| H | 0.52276000  | 1.67739900  | -1.46326300 |
| C | -0.72669900 | -1.03970500 | 2.86406400  |
| N | -0.96882600 | -1.33762900 | 3.96229000  |

Coordinates for TS **29**→**30**

FM

0 2

|   |             |             |             |
|---|-------------|-------------|-------------|
| N | 1.86042600  | 0.57610800  | 0.97007500  |
| H | 2.23167600  | 1.19488900  | 1.67122300  |
| C | 0.53098900  | 0.42168200  | 0.60069000  |
| C | 0.53443000  | -0.66268500 | -0.36680800 |
| N | -0.51481600 | -1.12715400 | -0.96270100 |
| C | 2.57227100  | -0.33833600 | 0.22536700  |

|   |             |             |             |
|---|-------------|-------------|-------------|
| H | 3.64440100  | -0.42445500 | 0.34408100  |
| N | 1.86360100  | -1.06066600 | -0.58806100 |
| C | -1.75358600 | -0.69175500 | -0.33045300 |
| H | -2.53621800 | -0.69104500 | -1.09906900 |
| N | -1.75633700 | 0.67770100  | 0.23751800  |
| N | -2.02015100 | -1.62102500 | 0.76808100  |
| H | -2.99177100 | -1.55311200 | 1.05840500  |
| H | -2.36434400 | 1.35040500  | -0.20911000 |
| C | -0.58591100 | 1.21681300  | 0.71774400  |
| H | -1.84617500 | -2.56741200 | 0.44172100  |
| H | -0.64813300 | 2.11149900  | 1.31947300  |
| N | -0.12089100 | 2.67789100  | -0.95894000 |
| H | 0.84838600  | 2.97486200  | -0.78864600 |
| H | -0.00990100 | 1.95342700  | -1.67902200 |

### Coordinates for TS **30**→**31**

FM

0 2

|   |             |             |             |
|---|-------------|-------------|-------------|
| N | 2.00431700  | -0.30103700 | 0.90618700  |
| H | 2.55912300  | 0.33428300  | 1.45480700  |
| C | 0.69485900  | -0.12713800 | 0.48044000  |
| C | 0.36853800  | -1.35032200 | -0.23531100 |
| N | -0.76554100 | -1.59090500 | -0.80339600 |
| C | 2.40267500  | -1.52880200 | 0.42500100  |
| H | 3.39738400  | -1.90061300 | 0.63284900  |
| N | 1.50863800  | -2.17014000 | -0.26398000 |
| C | -1.80420800 | -0.64939900 | -0.41582200 |
| H | -2.50547000 | -0.56599000 | -1.25369300 |
| N | -1.37461400 | 0.73979700  | -0.12132700 |
| N | -2.42384000 | -1.16550300 | 0.80975400  |
| H | -3.31883100 | -0.70885900 | 0.96395700  |
| H | -1.82754300 | 1.54844700  | -0.73447300 |
| C | -0.14850400 | 0.94497600  | 0.39185200  |
| H | -2.58931400 | -2.16027400 | 0.68450100  |
| H | 0.12240200  | 1.96287800  | 0.65611000  |
| N | -2.13570100 | 2.41407000  | -1.90178100 |
| H | -1.29787500 | 2.86717100  | -2.27876500 |
| H | -2.49116500 | 1.86196300  | -2.68813200 |

### Coordinates for TS **31**→**32**

FM

0 2

|   |             |             |             |
|---|-------------|-------------|-------------|
| N | 1.87567200  | 0.62917400  | 0.59490600  |
| H | 2.26615800  | 1.37794300  | 1.14446900  |
| C | 0.54535700  | 0.32342800  | 0.42731300  |
| C | 0.53480600  | -0.82409700 | -0.40710600 |
| N | -0.58294800 | -1.40991400 | -0.80383700 |
| C | 2.58214500  | -0.31356500 | -0.12364600 |

|   |             |             |             |
|---|-------------|-------------|-------------|
| H | 3.66255600  | -0.29830000 | -0.14750400 |
| N | 1.83295100  | -1.18518600 | -0.73847000 |
| C | -1.70466900 | -0.87470300 | -0.24224900 |
| H | -2.63232500 | -1.18176600 | -0.71626200 |
| N | -1.79649000 | 0.32978400  | 0.42576700  |
| N | -1.97229300 | -2.13520700 | 1.28779200  |
| H | -2.98344600 | -2.01033900 | 1.42008600  |
| C | -0.67315500 | 0.90996600  | 0.78691000  |
| H | -1.90018700 | -3.00860500 | 0.75166700  |
| H | -0.73603200 | 1.84654500  | 1.33677900  |

Coordinates for TS **29**→**33**

FM

0 2

|   |             |             |             |
|---|-------------|-------------|-------------|
| N | 1.97114300  | 0.57982000  | 0.53706700  |
| H | 2.42538500  | 1.42098000  | 0.85559600  |
| C | 0.66095400  | 0.44518700  | 0.14430900  |
| C | 0.52625400  | -0.87689800 | -0.24213300 |
| N | -0.64029100 | -1.44751000 | -0.68171800 |
| C | 2.56407200  | -0.64897700 | 0.35179300  |
| H | 3.60877200  | -0.81286800 | 0.56937100  |
| N | 1.72898300  | -1.54412000 | -0.10819800 |
| C | -1.66008600 | -0.59798000 | -0.69185200 |
| H | -2.55744800 | -0.89337500 | -1.22049400 |
| N | -1.54778800 | 0.76674200  | -0.52725000 |
| N | -2.54406200 | -1.35834200 | 1.07966200  |
| H | -2.69947100 | -2.33452300 | 0.80160900  |
| H | -2.41380800 | 1.28413400  | -0.52706900 |
| C | -0.45392800 | 1.44049800  | 0.17074200  |
| H | -1.71080800 | -1.43849800 | 1.67409100  |
| H | -0.73536800 | 1.68950400  | 1.20909300  |
| N | -0.23035100 | 2.72988400  | -0.48485400 |
| H | 0.31140000  | 3.35759600  | 0.09919400  |
| H | 0.24826700  | 2.60218400  | -1.37165100 |

Coordinates for TS **33**→**34**

FM

0 1

|   |             |             |             |
|---|-------------|-------------|-------------|
| N | -1.31464500 | -1.32190100 | 0.10750600  |
| H | -1.26887600 | -2.31893100 | 0.25410600  |
| C | -0.23902700 | -0.46402600 | 0.04957600  |
| C | -0.79793900 | 0.82616000  | -0.02394700 |
| N | -0.05485700 | 1.95876100  | -0.07753000 |
| C | -2.42925800 | -0.53367000 | 0.07836600  |
| H | -3.42216300 | -0.95599800 | 0.12574000  |
| N | -2.16392000 | 0.75243500  | -0.01351400 |
| C | 1.23419100  | 1.73304700  | -0.05367400 |
| H | 1.91786600  | 2.57409900  | -0.03005400 |

|   |            |             |             |
|---|------------|-------------|-------------|
| N | 1.83010300 | 0.51531900  | -0.03011800 |
| H | 2.80457900 | 0.41744700  | 0.26193000  |
| C | 1.14363300 | -0.69610200 | 0.07485300  |
| H | 2.84520400 | -0.97569400 | 1.56731600  |
| N | 1.62289500 | -1.94689700 | -0.23298100 |
| H | 2.56399900 | -2.11557900 | 0.10454800  |
| H | 1.31212600 | -2.32896300 | -1.12608300 |

Coordinates for TS **34**→**35**

FM

0 2

|   |             |             |             |
|---|-------------|-------------|-------------|
| N | 1.34733600  | 1.32140200  | -0.01527700 |
| H | 1.36975600  | 2.32258900  | -0.11908700 |
| C | 0.23938200  | 0.49206700  | -0.01712300 |
| C | 0.76041300  | -0.81556400 | 0.03252000  |
| N | -0.01721900 | -1.91428500 | 0.02094500  |
| C | 2.44261200  | 0.48884700  | 0.03028300  |
| H | 3.44690400  | 0.88707100  | 0.03257000  |
| N | 2.13786000  | -0.78141900 | 0.06777200  |
| C | -1.30561700 | -1.65677100 | -0.03641600 |
| H | -1.98981800 | -2.49881500 | -0.03203900 |
| N | -1.90914700 | -0.43641400 | -0.07636500 |
| H | -3.09111400 | -0.28208500 | 0.95588300  |
| C | -1.14409400 | 0.67126300  | -0.08026800 |
| N | -1.78739100 | 1.88451700  | -0.16902700 |
| H | -2.78267800 | 1.81662400  | 0.00598400  |
| H | -1.35127300 | 2.66438700  | 0.30099700  |

### Structure of two conformers of 3.

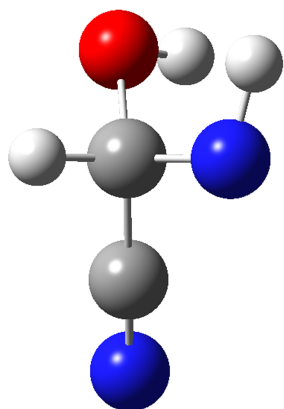

Structure of Isomer 1 of 3  
B3LYP/6-311G(d,p) Energy  
-262.6625629

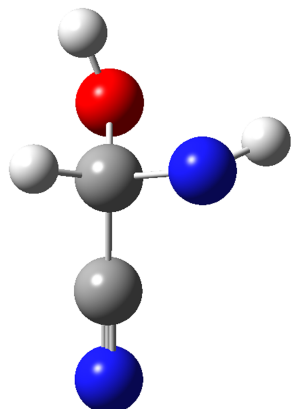

Structure of Isomer 2 of 3  
B3LYP/6-311G(d,p) Energy  
-262.6600117

### List of Radical-Neutral Molecule Structures.

#### Structure of 8-NH<sub>3</sub>

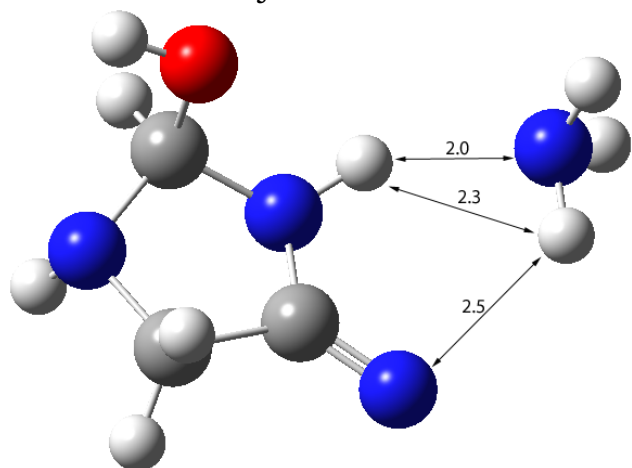

#### Structure of 9

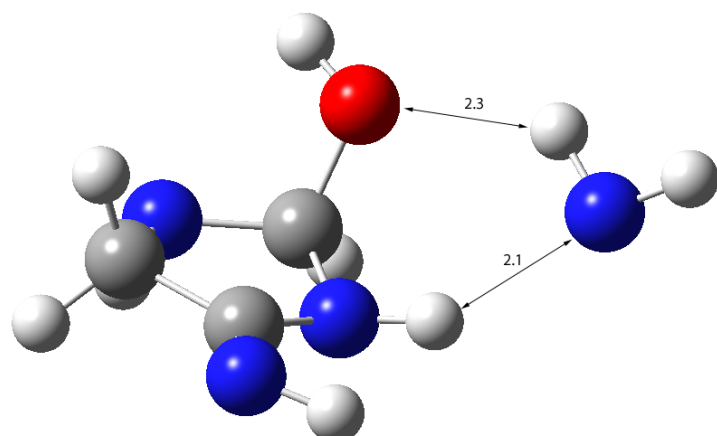

### Structure of 10-NH3

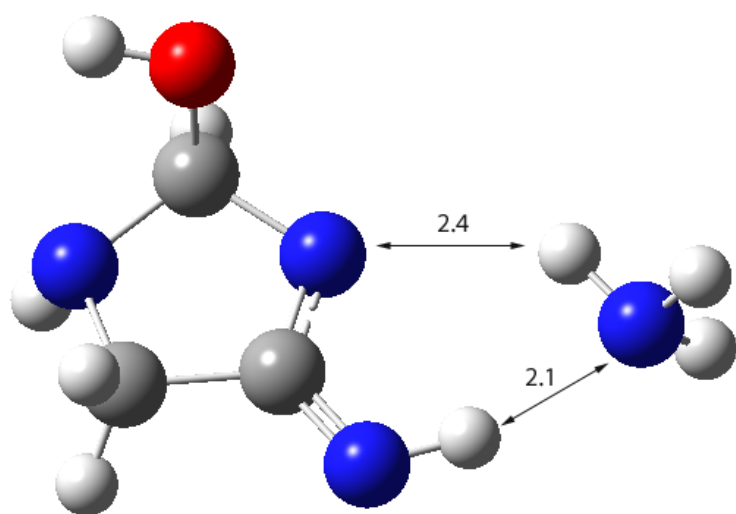

Supplement: c3cp53108b.pdf [file c3cp53108b.pdf]
